# Supplementary material
Source: publisher figshare collection journal article supplement (https://tandf.figshare.com/ndownloader/files/22358568)
Supplement: Supplementary file 1 [file 22358568]

Supplemental Table 1: Selection percentage by each genomic mutation pattern in simulation studies.

| Method | Scenario | ***x*** | IOD | Dose level | | | | | |
| --- | --- | --- | --- | --- | --- | --- | --- | --- | --- |
| 1 | 2 | 3 | 4 | 5 | 6 |
| Modified GY | 1 | (0, 0, 0, 0, 0) | 6 | 15.5 | 0.2 | 0.6 | 0.7 | 0.8 | 82.3 |
|  |  | (0, 0, 0, 0, 1) |  | 17.4 | 0.6 | 1.3 | 1.2 | 1.5 | 78.1 |
|  |  | (0, 0, 0, 1, 0) |  | 14.5 | 0.3 | 0.7 | 1.7 | 1.9 | 81.0 |
|  |  | (0, 0, 0, 1, 1) |  | 15.4 | 0.3 | 1.5 | 2.2 | 2.8 | 77.9 |
|  |  | (0, 0, 1, 0, 0) |  | 18.2 | 0.3 | 0.7 | 1.2 | 1.8 | 77.8 |
|  |  | (0, 0, 1, 0, 1) |  | 17.6 | 0.5 | 1.3 | 2.1 | 2.2 | 76.1 |
|  |  | (0, 0, 1, 1, 0) |  | 15.3 | 0.3 | 1.0 | 2.1 | 2.8 | 78.6 |
|  |  | (0, 0, 1, 1, 1) |  | 15.7 | 0.4 | 1.6 | 2.9 | 4.2 | 75.3 |
|  |  | (0, 1, 0, 0, 0) |  | 12.8 | 1.2 | 2.6 | 3.7 | 6.1 | 73.7 |
|  |  | (0, 1, 0, 0, 1) |  | 15.7 | 1.9 | 4.4 | 5.8 | 6.1 | 66.1 |
|  |  | (0, 1, 0, 1, 0) |  | 11.4 | 1.0 | 3.0 | 7.1 | 8.1 | 69.5 |
|  |  | (0, 1, 0, 1, 1) |  | 12.6 | 1.8 | 4.9 | 8.7 | 9.6 | 62.4 |
|  |  | (0, 1, 1, 0, 0) |  | 13.9 | 0.9 | 3.4 | 7.1 | 7.7 | 67.0 |
|  |  | (0, 1, 1, 0, 1) |  | 13.7 | 1.4 | 5.2 | 8.2 | 8.4 | 63.0 |
|  |  | (0, 1, 1, 1, 0) |  | 11.0 | 0.9 | 4.0 | 9.5 | 10.7 | 63.9 |
|  |  | (0, 1, 1, 1, 1) |  | 11.2 | 2.0 | 5.9 | 11.0 | 10.5 | 59.3 |
|  |  | (1, 0, 0, 0, 0) | 4 | 14.4 | 5.2 | 9.6 | 9.1 | 9.6 | 51.6 |
|  |  | (1, 0, 0, 0, 1) |  | 15.5 | 7.4 | 9.8 | 9.2 | 9.0 | 48.4 |
|  |  | (1, 0, 0, 1, 0) |  | 12.7 | 4.9 | 11.5 | 13.1 | 11.9 | 45.7 |
|  |  | (1, 0, 0, 1, 1) |  | 14.2 | 6.0 | 12.5 | 13.1 | 12.3 | 41.3 |
|  |  | (1, 0, 1, 0, 0) |  | 15.1 | 6.3 | 9.8 | 11.6 | 9.8 | 47.1 |
|  |  | (1, 0, 1, 0, 1) |  | 15.4 | 6.8 | 12.1 | 12.5 | 9.9 | 42.6 |
|  |  | (1, 0, 1, 1, 0) |  | 11.9 | 5.7 | 13.1 | 16.7 | 13.4 | 39.0 |
|  |  | (1, 0, 1, 1, 1) |  | 12.8 | 6.8 | 14.5 | 16.7 | 11.2 | 37.3 |
|  |  | (1, 1, 0, 0, 0) |  | 19.7 | 17.1 | 21.7 | 13.6 | 7.9 | 18.9 |
|  |  | (1, 1, 0, 0, 1) |  | 20.7 | 17.7 | 21.5 | 12.5 | 6.8 | 19.1 |
|  |  | (1, 1, 0, 1, 0) |  | 15.0 | 19.8 | 26.5 | 16.8 | 6.6 | 14.5 |
|  |  | (1, 1, 0, 1, 1) |  | 16.8 | 19.4 | 26.3 | 14.4 | 6.6 | 15.1 |
|  |  | (1, 1, 1, 0, 0) |  | 18.4 | 19.4 | 22.7 | 15.0 | 6.7 | 17.0 |
|  |  | (1, 1, 1, 0, 1) |  | 19.0 | 20.3 | 22.0 | 12.7 | 6.1 | 18.1 |
|  |  | (1, 1, 1, 1, 0) |  | 14.4 | 20.5 | 29.3 | 17.2 | 6.7 | 11.5 |
|  |  | (1, 1, 1, 1, 1) |  | 15.8 | 21.4 | 27.8 | 13.9 | 6.8 | 13.3 |
|  | 2 | (0, 0, 0, 0, 0) | 6 | 3.3 | 3.7 | 4.2 | 3.9 | 4.2 | 44.5 |
|  |  | (0, 0, 0, 0, 1) |  | 4.8 | 4.5 | 5.9 | 5.4 | 5.0 | 38.6 |
|  |  | (0, 0, 0, 1, 0) |  | 2.5 | 5.5 | 7.4 | 7.5 | 6.1 | 36.2 |
|  |  | (0, 0, 0, 1, 1) |  | 3.0 | 6.1 | 9.8 | 8.4 | 6.1 | 31.5 |
|  |  | (0, 0, 1, 0, 0) |  | 3.2 | 5.9 | 6.3 | 5.9 | 5.3 | 38.0 |
|  |  | (0, 0, 1, 0, 1) |  | 4.3 | 6.7 | 7.4 | 7.0 | 5.7 | 33.5 |
|  |  | (0, 0, 1, 1, 0) |  | 2.8 | 7.0 | 9.7 | 9.3 | 7.2 | 29.4 |
|  |  | (0, 0, 1, 1, 1) |  | 2.6 | 8.8 | 11.0 | 9.4 | 7.1 | 26.4 |
|  |  | (0, 1, 0, 0, 0) |  | 8.6 | 8.5 | 6.6 | 5.2 | 3.8 | 23.4 |
|  |  | (0, 1, 0, 0, 1) |  | 9.5 | 10.3 | 8.6 | 5.0 | 3.8 | 20.3 |
|  |  | (0, 1, 0, 1, 0) |  | 9.5 | 13.6 | 11.9 | 6.8 | 4.3 | 16.2 |
|  |  | (0, 1, 0, 1, 1) |  | 10.2 | 15.7 | 10.8 | 7.7 | 4.2 | 14.4 |
|  |  | (0, 1, 1, 0, 0) |  | 10.4 | 11.4 | 9.7 | 6.8 | 3.8 | 17.6 |
|  |  | (0, 1, 1, 0, 1) |  | 11.6 | 12.5 | 9.6 | 6.9 | 3.9 | 16.1 |
|  |  | (0, 1, 1, 1, 0) |  | 8.6 | 18.0 | 14.4 | 6.0 | 3.8 | 13.1 |
|  |  | (0, 1, 1, 1, 1) |  | 9.4 | 19.1 | 13.2 | 7.2 | 4.0 | 11.8 |
|  |  | (1, 0, 0, 0, 0) | No IOD | 6.0 | 3.2 | 1.4 | 0.8 | 0.4 | 5.6 |
|  |  | (1, 0, 0, 0, 1) |  | 9.8 | 4.2 | 1.8 | 1.4 | 0.7 | 5.9 |
|  |  | (1, 0, 0, 1, 0) |  | 14.7 | 6.4 | 1.8 | 1.0 | 0.4 | 2.7 |
|  |  | (1, 0, 0, 1, 1) |  | 17.2 | 9.0 | 3.0 | 1.3 | 0.4 | 2.6 |
|  |  | (1, 0, 1, 0, 0) |  | 11.5 | 5.7 | 2.4 | 0.9 | 0.3 | 3.5 |
|  |  | (1, 0, 1, 0, 1) |  | 14.3 | 7.3 | 2.6 | 1.1 | 0.8 | 3.6 |
|  |  | (1, 0, 1, 1, 0) |  | 20.9 | 8.7 | 2.3 | 0.7 | 0.5 | 1.6 |
|  |  | (1, 0, 1, 1, 1) |  | 22.2 | 11.3 | 3.6 | 0.9 | 0.5 | 1.7 |
|  |  | (1, 1, 0, 0, 0) |  | 2.9 | 0.5 | 0.2 | 0.0 | 0.0 | 0.7 |
|  |  | (1, 1, 0, 0, 1) |  | 6.6 | 1.3 | 0.2 | 0.1 | 0.1 | 1.1 |
|  |  | (1, 1, 0, 1, 0) |  | 5.4 | 0.5 | 0.0 | 0.0 | 0.0 | 0.2 |
|  |  | (1, 1, 0, 1, 1) |  | 10.8 | 1.2 | 0.2 | 0.1 | 0.0 | 0.1 |
|  |  | (1, 1, 1, 0, 0) |  | 5.8 | 0.7 | 0.1 | 0.0 | 0.0 | 0.4 |
|  |  | (1, 1, 1, 0, 1) |  | 9.6 | 1.8 | 0.4 | 0.1 | 0.0 | 0.8 |
|  |  | (1, 1, 1, 1, 0) |  | 10.4 | 0.5 | 0.1 | 0.1 | 0.0 | 0.1 |
|  |  | (1, 1, 1, 1, 1) |  | 16.0 | 2.2 | 0.1 | 0.1 | 0.1 | 0.0 |
|  | 3 | (0, 0, 0, 0, 0) | 4 | 2.4 | 4.9 | 9.3 | 10.8 | 9.8 | 58.9 |
|  |  | (0, 0, 0, 0, 1) |  | 4.0 | 6.6 | 12.9 | 13.8 | 10.4 | 47.6 |
|  |  | (0, 0, 0, 1, 0) |  | 1.1 | 3.7 | 15.9 | 24.4 | 17.4 | 33.8 |
|  |  | (0, 0, 0, 1, 1) |  | 1.8 | 7.3 | 21.1 | 22.3 | 14.5 | 28.9 |
|  |  | (0, 0, 1, 0, 0) |  | 1.9 | 6.7 | 14.2 | 18.2 | 13.7 | 41.2 |
|  |  | (0, 0, 1, 0, 1) |  | 3.6 | 8.5 | 17.3 | 17.8 | 14.2 | 34.2 |
|  |  | (0, 0, 1, 1, 0) |  | 1.2 | 4.7 | 24.2 | 30.0 | 15.6 | 20.5 |
|  |  | (0, 0, 1, 1, 1) |  | 1.6 | 9.4 | 26.7 | 27.5 | 13.3 | 17.6 |
|  |  | (0, 1, 0, 0, 0) |  | 12.6 | 18.5 | 18.1 | 11.5 | 7.2 | 25.2 |
|  |  | (0, 1, 0, 0, 1) |  | 12.3 | 21.0 | 17.9 | 12.9 | 6.9 | 20.8 |
|  |  | (0, 1, 0, 1, 0) |  | 5.0 | 25.9 | 32.9 | 14.3 | 6.5 | 11.4 |
|  |  | (0, 1, 0, 1, 1) |  | 7.6 | 27.2 | 29.0 | 14.8 | 6.4 | 10.4 |
|  |  | (0, 1, 1, 0, 0) |  | 11.6 | 22.8 | 21.8 | 14.6 | 6.8 | 16.9 |
|  |  | (0, 1, 1, 0, 1) |  | 11.2 | 23.8 | 23.4 | 13.3 | 7.4 | 14.3 |
|  |  | (0, 1, 1, 1, 0) |  | 4.1 | 30.3 | 34.9 | 13.9 | 5.6 | 7.2 |
|  |  | (0, 1, 1, 1, 1) |  | 5.5 | 32.1 | 33.0 | 14.0 | 4.3 | 6.9 |
|  |  | (1, 0, 0, 0, 0) | 1 | 26.7 | 17.8 | 10.6 | 5.4 | 2.7 | 9.5 |
|  |  | (1, 0, 0, 0, 1) |  | 25.0 | 20.6 | 11.8 | 4.9 | 3.3 | 9.6 |
|  |  | (1, 0, 0, 1, 0) |  | 26.6 | 32.9 | 15.8 | 4.2 | 2.2 | 3.9 |
|  |  | (1, 0, 0, 1, 1) |  | 25.5 | 32.5 | 15.9 | 6.7 | 2.4 | 3.6 |
|  |  | (1, 0, 1, 0, 0) |  | 27.7 | 24.0 | 13.9 | 6.3 | 2.8 | 5.6 |
|  |  | (1, 0, 1, 0, 1) |  | 27.2 | 24.5 | 16.2 | 6.2 | 3.0 | 6.3 |
|  |  | (1, 0, 1, 1, 0) |  | 25.4 | 39.9 | 17.0 | 4.3 | 1.4 | 2.3 |
|  |  | (1, 0, 1, 1, 1) |  | 22.9 | 39.7 | 19.4 | 4.5 | 1.8 | 2.4 |
|  |  | (1, 1, 0, 0, 0) |  | 32.6 | 10.4 | 3.6 | 1.5 | 0.8 | 2.9 |
|  |  | (1, 1, 0, 0, 1) |  | 34.6 | 14.3 | 4.1 | 2.0 | 1.0 | 3.1 |
|  |  | (1, 1, 0, 1, 0) |  | 42.1 | 20.1 | 3.7 | 1.3 | 0.5 | 1.3 |
|  |  | (1, 1, 0, 1, 1) |  | 40.1 | 24.2 | 5.3 | 1.5 | 0.7 | 1.8 |
|  |  | (1, 1, 1, 0, 0) |  | 37.4 | 17.1 | 4.4 | 1.3 | 0.9 | 2.4 |
|  |  | (1, 1, 1, 0, 1) |  | 39.1 | 19.2 | 5.4 | 2.2 | 0.9 | 3.1 |
|  |  | (1, 1, 1, 1, 0) |  | 47.7 | 25.2 | 4.6 | 1.0 | 0.4 | 0.8 |
|  |  | (1, 1, 1, 1, 1) |  | 44.1 | 30.0 | 5.7 | 1.4 | 0.7 | 1.2 |
|  | 4 | (0, 0, 0, 0, 0) | 3 | 9.3 | 12.1 | 12.6 | 10.4 | 8.2 | 45.6 |
|  |  | (0, 0, 0, 0, 1) |  | 11.4 | 14.0 | 15.5 | 10.7 | 8.1 | 37.4 |
|  |  | (0, 0, 0, 1, 0) |  | 6.8 | 16.3 | 22.5 | 17.2 | 11.1 | 25.6 |
|  |  | (0, 0, 0, 1, 1) |  | 9.4 | 19.0 | 23.5 | 15.6 | 8.7 | 22.8 |
|  |  | (0, 0, 1, 0, 0) |  | 10.4 | 15.5 | 18.0 | 14.6 | 8.6 | 31.8 |
|  |  | (0, 0, 1, 0, 1) |  | 10.9 | 20.1 | 18.3 | 13.9 | 8.0 | 27.2 |
|  |  | (0, 0, 1, 1, 0) |  | 6.1 | 21.2 | 27.4 | 17.7 | 9.0 | 18.1 |
|  |  | (0, 0, 1, 1, 1) |  | 8.3 | 24.3 | 26.6 | 16.9 | 6.8 | 16.6 |
|  |  | (0, 1, 0, 0, 0) |  | 15.3 | 23.8 | 17.7 | 11.9 | 6.8 | 22.4 |
|  |  | (0, 1, 0, 0, 1) |  | 16.3 | 24.5 | 17.7 | 11.5 | 7.1 | 19.5 |
|  |  | (0, 1, 0, 1, 0) |  | 8.8 | 33.5 | 27.3 | 12.7 | 6.2 | 10.9 |
|  |  | (0, 1, 0, 1, 1) |  | 12.5 | 33.3 | 26.4 | 10.8 | 5.0 | 11.2 |
|  |  | (0, 1, 1, 0, 0) |  | 13.2 | 30.8 | 21.7 | 11.1 | 6.4 | 15.5 |
|  |  | (0, 1, 1, 0, 1) |  | 15.1 | 30.2 | 21.2 | 10.7 | 6.4 | 14.4 |
|  |  | (0, 1, 1, 1, 0) |  | 7.6 | 39.3 | 28.4 | 11.0 | 5.1 | 8.1 |
|  |  | (0, 1, 1, 1, 1) |  | 9.8 | 39.0 | 27.3 | 9.6 | 5.0 | 8.4 |
|  |  | (1, 0, 0, 0, 0) | 2 | 21.9 | 24.9 | 15.6 | 8.8 | 4.9 | 16.2 |
|  |  | (1, 0, 0, 0, 1) |  | 22.4 | 26.3 | 17.1 | 9.0 | 3.7 | 14.4 |
|  |  | (1, 0, 0, 1, 0) |  | 18.6 | 37.5 | 21.7 | 8.8 | 3.5 | 7.4 |
|  |  | (1, 0, 0, 1, 1) |  | 19.6 | 39.3 | 20.9 | 6.8 | 3.6 | 7.4 |
|  |  | (1, 0, 1, 0, 0) |  | 21.7 | 31.1 | 18.5 | 7.9 | 4.5 | 11.7 |
|  |  | (1, 0, 1, 0, 1) |  | 22.3 | 33.7 | 17.1 | 7.9 | 4.1 | 10.5 |
|  |  | (1, 0, 1, 1, 0) |  | 16.7 | 43.2 | 22.4 | 7.8 | 2.6 | 5.4 |
|  |  | (1, 0, 1, 1, 1) |  | 17.4 | 44.6 | 20.0 | 6.6 | 3.2 | 6.2 |
|  |  | (1, 1, 0, 0, 0) |  | 34.9 | 27.8 | 10.7 | 4.4 | 2.1 | 9.5 |
|  |  | (1, 1, 0, 0, 1) |  | 34.3 | 28.4 | 12.4 | 5.0 | 2.4 | 7.7 |
|  |  | (1, 1, 0, 1, 0) |  | 34.3 | 37.3 | 13.2 | 4.5 | 1.8 | 4.4 |
|  |  | (1, 1, 0, 1, 1) |  | 33.8 | 39.2 | 13.3 | 4.3 | 1.5 | 4.1 |
|  |  | (1, 1, 1, 0, 0) |  | 35.7 | 33.5 | 11.2 | 4.8 | 1.8 | 6.9 |
|  |  | (1, 1, 1, 0, 1) |  | 33.4 | 34.6 | 11.6 | 4.8 | 2.6 | 6.5 |
|  |  | (1, 1, 1, 1, 0) |  | 33.5 | 42.9 | 12.1 | 3.9 | 1.6 | 3.8 |
|  |  | (1, 1, 1, 1, 1) |  | 31.2 | 44.2 | 11.9 | 4.2 | 2.0 | 3.9 |
|  | 5 | (0, 0, 0, 0, 0) | 3 | 10.9 | 21.8 | 21.9 | 15.2 | 8.4 | 20.9 |
|  |  | (0, 0, 0, 0, 1) |  | 15.1 | 25.2 | 21.8 | 13.9 | 7.3 | 15.1 |
|  |  | (0, 0, 0, 1, 0) |  | 6.7 | 30.5 | 35.0 | 16.4 | 5.7 | 5.6 |
|  |  | (0, 0, 0, 1, 1) |  | 9.7 | 34.8 | 32.3 | 12.7 | 5.2 | 5.1 |
|  |  | (0, 0, 1, 0, 0) |  | 11.6 | 29.4 | 27.0 | 14.6 | 7.0 | 9.9 |
|  |  | (0, 0, 1, 0, 1) |  | 13.7 | 32.0 | 27.1 | 11.3 | 6.3 | 8.5 |
|  |  | (0, 0, 1, 1, 0) |  | 5.8 | 37.8 | 36.7 | 13.2 | 3.9 | 2.5 |
|  |  | (0, 0, 1, 1, 1) |  | 8.2 | 40.1 | 34.5 | 11.7 | 3.0 | 2.5 |
|  |  | (0, 1, 0, 0, 0) |  | 11.6 | 30.1 | 27.8 | 13.7 | 7.1 | 9.4 |
|  |  | (0, 1, 0, 0, 1) |  | 14.3 | 32.0 | 26.9 | 12.0 | 5.7 | 8.1 |
|  |  | (0, 1, 0, 1, 0) |  | 5.2 | 38.5 | 38.1 | 12.3 | 3.4 | 2.4 |
|  |  | (0, 1, 0, 1, 1) |  | 8.8 | 41.2 | 34.0 | 10.5 | 3.2 | 2.3 |
|  |  | (0, 1, 1, 0, 0) |  | 10.3 | 36.6 | 31.5 | 12.1 | 4.3 | 5.2 |
|  |  | (0, 1, 1, 0, 1) |  | 12.4 | 38.5 | 29.5 | 10.9 | 3.1 | 5.0 |
|  |  | (0, 1, 1, 1, 0) |  | 4.9 | 45.5 | 37.7 | 9.0 | 1.5 | 1.3 |
|  |  | (0, 1, 1, 1, 1) |  | 6.9 | 47.7 | 33.0 | 9.4 | 1.9 | 1.0 |
|  |  | (1, 0, 0, 0, 0) |  | 12.3 | 30.5 | 26.8 | 13.8 | 6.2 | 10.0 |
|  |  | (1, 0, 0, 0, 1) |  | 14.3 | 33.2 | 26.0 | 12.3 | 5.5 | 8.0 |
|  |  | (1, 0, 0, 1, 0) |  | 6.7 | 39.6 | 36.7 | 11.5 | 3.0 | 2.5 |
|  |  | (1, 0, 0, 1, 1) |  | 8.5 | 42.5 | 33.3 | 10.2 | 2.7 | 2.7 |
|  |  | (1, 0, 1, 0, 0) |  | 11.4 | 36.0 | 31.5 | 11.7 | 4.6 | 4.6 |
|  |  | (1, 0, 1, 0, 1) |  | 13.1 | 39.4 | 29.2 | 9.8 | 3.4 | 4.8 |
|  |  | (1, 0, 1, 1, 0) |  | 6.0 | 45.0 | 37.7 | 8.4 | 1.7 | 1.2 |
|  |  | (1, 0, 1, 1, 1) |  | 7.5 | 47.3 | 34.8 | 6.8 | 2.4 | 1.3 |
|  |  | (1, 1, 0, 0, 0) |  | 13.7 | 38.5 | 24.9 | 10.8 | 5.4 | 6.3 |
|  |  | (1, 1, 0, 0, 1) |  | 16.7 | 38.5 | 23.9 | 10.7 | 3.8 | 5.9 |
|  |  | (1, 1, 0, 1, 0) |  | 8.3 | 47.3 | 31.1 | 8.2 | 2.9 | 2.2 |
|  |  | (1, 1, 0, 1, 1) |  | 10.3 | 46.9 | 31.1 | 7.2 | 2.4 | 2.1 |
|  |  | (1, 1, 1, 0, 0) |  | 12.0 | 44.2 | 26.9 | 9.4 | 3.3 | 3.8 |
|  |  | (1, 1, 1, 0, 1) |  | 14.6 | 44.0 | 25.8 | 8.7 | 3.2 | 3.5 |
|  |  | (1, 1, 1, 1, 0) |  | 6.7 | 53.3 | 30.0 | 6.9 | 2.0 | 1.1 |
|  |  | (1, 1, 1, 1, 1) |  | 8.0 | 53.7 | 28.5 | 7.4 | 1.6 | 0.9 |
|  | 6 | (0, 0, 0, 0, 0) | 5 | 4.7 | 1.1 | 3.7 | 5.1 | 6.6 | 78.3 |
|  |  | (0, 0, 0, 0, 1) |  | 6.0 | 2.6 | 5.5 | 11.1 | 11.7 | 62.8 |
|  |  | (0, 0, 0, 1, 0) |  | 2.5 | 1.1 | 7.1 | 15.2 | 18.0 | 55.7 |
|  |  | (0, 0, 0, 1, 1) |  | 3.0 | 2.6 | 12.6 | 20.8 | 16.0 | 44.7 |
|  |  | (0, 0, 1, 0, 0) |  | 4.1 | 2.2 | 7.5 | 12.0 | 13.6 | 60.4 |
|  |  | (0, 0, 1, 0, 1) |  | 4.6 | 4.1 | 12.6 | 15.9 | 14.0 | 48.5 |
|  |  | (0, 0, 1, 1, 0) |  | 1.7 | 2.9 | 13.1 | 25.9 | 19.1 | 37.0 |
|  |  | (0, 0, 1, 1, 1) |  | 2.2 | 5.0 | 19.0 | 25.9 | 17.5 | 30.1 |
|  |  | (0, 1, 0, 0, 0) | 3 | 17.2 | 31.7 | 24.1 | 12.0 | 5.3 | 7.8 |
|  |  | (0, 1, 0, 0, 1) |  | 19.2 | 32.4 | 24.7 | 10.5 | 4.6 | 6.2 |
|  |  | (0, 1, 0, 1, 0) |  | 8.7 | 43.6 | 33.8 | 9.1 | 2.6 | 1.6 |
|  |  | (0, 1, 0, 1, 1) |  | 10.4 | 44.5 | 32.0 | 8.1 | 2.3 | 1.9 |
|  |  | (0, 1, 1, 0, 0) |  | 14.9 | 40.0 | 27.0 | 10.1 | 3.7 | 3.2 |
|  |  | (0, 1, 1, 0, 1) |  | 16.9 | 39.5 | 26.8 | 9.1 | 3.6 | 2.8 |
|  |  | (0, 1, 1, 1, 0) |  | 7.0 | 49.5 | 34.9 | 5.8 | 1.5 | 0.9 |
|  |  | (0, 1, 1, 1, 1) |  | 9.1 | 51.4 | 30.0 | 7.0 | 1.3 | 0.9 |
|  |  | (1, 0, 0, 0, 0) | 3 | 18.3 | 30.8 | 24.1 | 13.0 | 5.9 | 6.2 |
|  |  | (1, 0, 0, 0, 1) |  | 20.7 | 32.2 | 23.2 | 11.1 | 4.3 | 6.0 |
|  |  | (1, 0, 0, 1, 0) |  | 8.0 | 46.4 | 32.0 | 9.4 | 2.0 | 1.8 |
|  |  | (1, 0, 0, 1, 1) |  | 10.4 | 46.1 | 30.2 | 7.7 | 3.1 | 1.8 |
|  |  | (1, 0, 1, 0, 0) |  | 16.6 | 38.2 | 27.0 | 10.4 | 3.6 | 3.0 |
|  |  | (1, 0, 1, 0, 1) |  | 18.0 | 38.1 | 26.7 | 9.7 | 2.8 | 3.1 |
|  |  | (1, 0, 1, 1, 0) |  | 7.4 | 51.7 | 31.5 | 6.6 | 1.5 | 0.9 |
|  |  | (1, 0, 1, 1, 1) |  | 9.6 | 51.0 | 30.6 | 5.9 | 1.6 | 0.8 |
|  |  | (1, 1, 0, 0, 0) | 1 | 67.8 | 15.1 | 1.5 | 0.1 | 0.1 | 0.0 |
|  |  | (1, 1, 0, 0, 1) |  | 63.8 | 19.7 | 2.1 | 0.5 | 0.1 | 0.0 |
|  |  | (1, 1, 0, 1, 0) |  | 71.3 | 23.1 | 0.4 | 0.0 | 0.0 | 0.0 |
|  |  | (1, 1, 0, 1, 1) |  | 66.1 | 27.7 | 1.2 | 0.1 | 0.0 | 0.0 |
|  |  | (1, 1, 1, 0, 0) |  | 68.3 | 20.7 | 1.1 | 0.2 | 0.0 | 0.0 |
|  |  | (1, 1, 1, 0, 1) |  | 63.9 | 25.8 | 1.3 | 0.2 | 0.1 | 0.1 |
|  |  | (1, 1, 1, 1, 0) |  | 67.8 | 29.1 | 0.5 | 0.0 | 0.0 | 0.0 |
|  |  | (1, 1, 1, 1, 1) |  | 61.0 | 35.6 | 0.6 | 0.0 | 0.0 | 0.0 |
|  | 7 | (0, 0, 0, 0, 0) | 4 | 2.8 | 10.9 | 17.3 | 13.6 | 10.7 | 44.4 |
|  |  | (0, 0, 0, 0, 1) |  | 6.3 | 14.0 | 18.3 | 15.0 | 10.7 | 35.3 |
|  |  | (0, 0, 0, 1, 0) |  | 1.5 | 6.9 | 27.6 | 27.2 | 14.2 | 22.5 |
|  |  | (0, 0, 0, 1, 1) |  | 2.4 | 11.6 | 30.6 | 22.4 | 11.7 | 21.0 |
|  |  | (0, 0, 1, 0, 0) |  | 3.1 | 11.1 | 22.9 | 18.0 | 12.7 | 32.0 |
|  |  | (0, 0, 1, 0, 1) |  | 4.7 | 12.8 | 24.8 | 18.3 | 13.2 | 26.0 |
|  |  | (0, 0, 1, 1, 0) |  | 1.0 | 7.5 | 33.7 | 30.1 | 13.1 | 14.5 |
|  |  | (0, 0, 1, 1, 1) |  | 1.7 | 10.7 | 37.6 | 25.8 | 11.0 | 13.0 |
|  |  | (0, 1, 0, 0, 0) | 5 | 55.9 | 2.0 | 4.3 | 5.5 | 4.7 | 27.4 |
|  |  | (0, 1, 0, 0, 1) |  | 42.2 | 2.9 | 6.7 | 9.1 | 7.2 | 31.7 |
|  |  | (0, 1, 0, 1, 0) |  | 30.5 | 1.2 | 6.0 | 15.7 | 12.7 | 33.7 |
|  |  | (0, 1, 0, 1, 1) |  | 22.6 | 2.7 | 11.5 | 17.6 | 13.9 | 31.6 |
|  |  | (0, 1, 1, 0, 0) |  | 37.0 | 2.5 | 7.6 | 9.7 | 8.9 | 34.2 |
|  |  | (0, 1, 1, 0, 1) |  | 29.6 | 3.2 | 10.3 | 13.5 | 10.7 | 32.6 |
|  |  | (0, 1, 1, 1, 0) |  | 18.1 | 1.4 | 10.0 | 23.1 | 17.3 | 29.9 |
|  |  | (0, 1, 1, 1, 1) |  | 13.9 | 2.3 | 13.7 | 26.5 | 17.9 | 25.5 |
|  |  | (1, 0, 0, 0, 0) | 5 | 56.0 | 2.1 | 3.2 | 5.3 | 5.5 | 27.8 |
|  |  | (1, 0, 0, 0, 1) |  | 42.3 | 3.5 | 6.0 | 8.1 | 7.4 | 32.6 |
|  |  | (1, 0, 0, 1, 0) |  | 29.1 | 1.1 | 6.0 | 15.7 | 14.2 | 33.9 |
|  |  | (1, 0, 0, 1, 1) |  | 23.6 | 2.3 | 10.9 | 17.0 | 14.0 | 32.1 |
|  |  | (1, 0, 1, 0, 0) |  | 35.5 | 2.6 | 7.2 | 11.1 | 8.5 | 34.9 |
|  |  | (1, 0, 1, 0, 1) |  | 28.6 | 3.0 | 9.9 | 14.4 | 10.8 | 33.1 |
|  |  | (1, 0, 1, 1, 0) |  | 17.4 | 1.5 | 10.0 | 21.7 | 17.9 | 31.3 |
|  |  | (1, 0, 1, 1, 1) |  | 14.5 | 2.3 | 15.2 | 24.5 | 16.6 | 26.7 |
|  |  | (1, 1, 0, 0, 0) | 1 | 88.3 | 0.5 | 0.8 | 0.9 | 1.0 | 8.4 |
|  |  | (1, 1, 0, 0, 1) |  | 80.9 | 1.3 | 1.6 | 1.9 | 2.3 | 11.8 |
|  |  | (1, 1, 0, 1, 0) |  | 74.9 | 1.2 | 1.8 | 3.4 | 4.3 | 14.3 |
|  |  | (1, 1, 0, 1, 1) |  | 65.7 | 2.4 | 3.3 | 5.9 | 5.6 | 17.0 |
|  |  | (1, 1, 1, 0, 0) |  | 78.0 | 1.5 | 1.6 | 2.8 | 2.7 | 13.2 |
|  |  | (1, 1, 1, 0, 1) |  | 68.8 | 1.9 | 3.1 | 4.1 | 4.2 | 17.8 |
|  |  | (1, 1, 1, 1, 0) |  | 62.8 | 2.3 | 3.1 | 6.1 | 6.4 | 19.1 |
|  |  | (1, 1, 1, 1, 1) |  | 52.5 | 3.3 | 4.2 | 9.7 | 9.0 | 21.1 |

| Method | Scenario | ***x*** | IOD | Dose level | | | | | |
| --- | --- | --- | --- | --- | --- | --- | --- | --- | --- |
| 1 | 2 | 3 | 4 | 5 | 6 |
| Proposed M1&M2 | 1 | (0, 0, 0, 0, 0) | 6 | 13.9 | 0.5 | 1.9 | 5.1 | 10.3 | 68.5 |
|  |  | (0, 0, 0, 0, 1) |  | 14.7 | 0.5 | 2.4 | 5.7 | 9.4 | 67.3 |
|  |  | (0, 0, 0, 1, 0) |  | 13.6 | 0.5 | 1.9 | 5.3 | 10.1 | 68.8 |
|  |  | (0, 0, 0, 1, 1) |  | 14.3 | 0.5 | 2.3 | 5.6 | 10.2 | 67.2 |
|  |  | (0, 0, 1, 0, 0) |  | 13.4 | 0.5 | 1.7 | 5.5 | 9.3 | 69.7 |
|  |  | (0, 0, 1, 0, 1) |  | 14.1 | 0.5 | 2.4 | 5.6 | 9.9 | 67.6 |
|  |  | (0, 0, 1, 1, 0) |  | 13.5 | 0.5 | 1.8 | 5.3 | 10.0 | 69.0 |
|  |  | (0, 0, 1, 1, 1) |  | 13.8 | 0.5 | 1.9 | 6.5 | 9.7 | 67.7 |
|  |  | (0, 1, 0, 0, 0) |  | 13.4 | 0.6 | 3.3 | 8.8 | 13.3 | 60.6 |
|  |  | (0, 1, 0, 0, 1) |  | 13.9 | 1.0 | 3.9 | 9.1 | 13.5 | 58.6 |
|  |  | (0, 1, 0, 1, 0) |  | 13.2 | 0.7 | 2.7 | 9.0 | 15.1 | 59.3 |
|  |  | (0, 1, 0, 1, 1) |  | 13.6 | 0.9 | 3.5 | 9.9 | 14.4 | 57.7 |
|  |  | (0, 1, 1, 0, 0) |  | 13.2 | 0.7 | 3.0 | 8.7 | 13.5 | 61.0 |
|  |  | (0, 1, 1, 0, 1) |  | 13.5 | 1.1 | 3.8 | 9.6 | 12.4 | 59.6 |
|  |  | (0, 1, 1, 1, 0) |  | 12.7 | 0.7 | 3.1 | 9.4 | 13.8 | 60.4 |
|  |  | (0, 1, 1, 1, 1) |  | 13.6 | 0.8 | 3.8 | 9.6 | 14.1 | 58.1 |
|  |  | (1, 0, 0, 0, 0) | 4 | 13.6 | 2.6 | 11.2 | 19.6 | 19.1 | 33.7 |
|  |  | (1, 0, 0, 0, 1) |  | 13.8 | 3.1 | 11.0 | 19.1 | 19.2 | 33.6 |
|  |  | (1, 0, 0, 1, 0) |  | 13.2 | 3.0 | 10.4 | 21.2 | 20.2 | 31.9 |
|  |  | (1, 0, 0, 1, 1) |  | 13.7 | 2.9 | 12.0 | 19.5 | 19.9 | 31.9 |
|  |  | (1, 0, 1, 0, 0) |  | 13.6 | 2.6 | 10.3 | 19.2 | 21.1 | 33.1 |
|  |  | (1, 0, 1, 0, 1) |  | 13.7 | 3.1 | 10.6 | 19.6 | 19.6 | 33.1 |
|  |  | (1, 0, 1, 1, 0) |  | 13.2 | 2.9 | 11.0 | 20.1 | 21.2 | 31.6 |
|  |  | (1, 0, 1, 1, 1) |  | 13.7 | 3.4 | 11.6 | 18.9 | 20.8 | 31.6 |
|  |  | (1, 1, 0, 0, 0) |  | 13.9 | 4.7 | 17.0 | 24.7 | 18.2 | 21.1 |
|  |  | (1, 1, 0, 0, 1) |  | 14.1 | 5.4 | 16.8 | 24.3 | 17.4 | 21.6 |
|  |  | (1, 1, 0, 1, 0) |  | 13.5 | 5.4 | 18.2 | 26.2 | 17.8 | 18.8 |
|  |  | (1, 1, 0, 1, 1) |  | 13.7 | 5.7 | 19.1 | 24.6 | 17.0 | 19.9 |
|  |  | (1, 1, 1, 0, 0) |  | 14.0 | 5.8 | 16.0 | 25.5 | 18.1 | 20.4 |
|  |  | (1, 1, 1, 0, 1) |  | 14.3 | 5.7 | 16.4 | 24.9 | 17.2 | 21.1 |
|  |  | (1, 1, 1, 1, 0) |  | 13.3 | 5.8 | 18.5 | 25.5 | 18.1 | 18.6 |
|  |  | (1, 1, 1, 1, 1) |  | 13.9 | 6.3 | 17.7 | 24.9 | 17.4 | 19.6 |
|  | 2 | (0, 0, 0, 0, 0) | 6 | 10.6 | 8.0 | 6.0 | 5.8 | 3.9 | 25.1 |
|  |  | (0, 0, 0, 0, 1) |  | 10.4 | 8.6 | 6.7 | 4.7 | 4.3 | 24.7 |
|  |  | (0, 0, 0, 1, 0) |  | 10.2 | 7.2 | 6.9 | 5.9 | 4.3 | 25.0 |
|  |  | (0, 0, 0, 1, 1) |  | 10.3 | 7.4 | 7.8 | 5.0 | 3.6 | 25.3 |
|  |  | (0, 0, 1, 0, 0) |  | 10.6 | 8.5 | 6.7 | 5.6 | 3.8 | 24.2 |
|  |  | (0, 0, 1, 0, 1) |  | 10.8 | 9.2 | 6.4 | 4.9 | 3.3 | 24.8 |
|  |  | (0, 0, 1, 1, 0) |  | 10.3 | 7.9 | 6.9 | 5.7 | 3.8 | 24.9 |
|  |  | (0, 0, 1, 1, 1) |  | 10.4 | 8.2 | 6.9 | 6.1 | 3.2 | 24.8 |
|  |  | (0, 1, 0, 0, 0) |  | 13.5 | 11.5 | 7.6 | 4.6 | 2.4 | 18.2 |
|  |  | (0, 1, 0, 0, 1) |  | 13.4 | 11.9 | 7.4 | 3.9 | 2.0 | 18.7 |
|  |  | (0, 1, 0, 1, 0) |  | 13.0 | 12.2 | 8.4 | 4.6 | 2.8 | 17.4 |
|  |  | (0, 1, 0, 1, 1) |  | 14.1 | 11.9 | 7.5 | 4.0 | 2.5 | 18.1 |
|  |  | (0, 1, 1, 0, 0) |  | 14.2 | 12.3 | 7.5 | 4.4 | 3.1 | 17.2 |
|  |  | (0, 1, 1, 0, 1) |  | 14.8 | 12.0 | 7.4 | 3.6 | 2.8 | 17.6 |
|  |  | (0, 1, 1, 1, 0) |  | 13.4 | 12.9 | 8.0 | 3.9 | 2.9 | 17.6 |
|  |  | (0, 1, 1, 1, 1) |  | 13.4 | 13.5 | 6.9 | 4.1 | 2.6 | 17.9 |
|  |  | (1, 0, 0, 0, 0) | No IOD | 15.8 | 5.8 | 1.6 | 0.7 | 0.4 | 2.9 |
|  |  | (1, 0, 0, 0, 1) |  | 15.6 | 5.8 | 2.0 | 0.9 | 0.2 | 3.4 |
|  |  | (1, 0, 0, 1, 0) |  | 16.6 | 5.7 | 1.1 | 0.7 | 0.3 | 2.6 |
|  |  | (1, 0, 0, 1, 1) |  | 16.4 | 6.0 | 1.9 | 0.5 | 0.1 | 2.8 |
|  |  | (1, 0, 1, 0, 0) |  | 16.1 | 6.7 | 1.3 | 0.8 | 0.3 | 3.1 |
|  |  | (1, 0, 1, 0, 1) |  | 16.4 | 6.2 | 1.8 | 0.9 | 0.2 | 3.6 |
|  |  | (1, 0, 1, 1, 0) |  | 16.7 | 6.0 | 1.1 | 0.6 | 0.1 | 2.5 |
|  |  | (1, 0, 1, 1, 1) |  | 17.6 | 6.3 | 1.5 | 0.6 | 0.2 | 3.0 |
|  |  | (1, 1, 0, 0, 0) |  | 9.1 | 1.3 | 0.3 | 0.1 | 0.0 | 1.4 |
|  |  | (1, 1, 0, 0, 1) |  | 9.3 | 2.1 | 0.4 | 0.3 | 0.0 | 1.6 |
|  |  | (1, 1, 0, 1, 0) |  | 8.0 | 1.0 | 0.2 | 0.0 | 0.0 | 1.1 |
|  |  | (1, 1, 0, 1, 1) |  | 9.8 | 1.5 | 0.2 | 0.0 | 0.0 | 1.2 |
|  |  | (1, 1, 1, 0, 0) |  | 9.2 | 1.4 | 0.3 | 0.1 | 0.0 | 1.1 |
|  |  | (1, 1, 1, 0, 1) |  | 9.7 | 2.1 | 0.4 | 0.0 | 0.0 | 1.3 |
|  |  | (1, 1, 1, 1, 0) |  | 8.4 | 1.2 | 0.1 | 0.0 | 0.1 | 1.0 |
|  |  | (1, 1, 1, 1, 1) |  | 10.5 | 1.6 | 0.2 | 0.1 | 0.0 | 1.0 |
|  | 3 | (0, 0, 0, 0, 0) | 4 | 2.7 | 10.7 | 41.1 | 27.5 | 5.6 | 5.0 |
|  |  | (0, 0, 0, 0, 1) |  | 2.7 | 11.4 | 40.4 | 27.7 | 5.5 | 5.0 |
|  |  | (0, 0, 0, 1, 0) |  | 2.6 | 9.9 | 41.9 | 29.5 | 5.3 | 3.5 |
|  |  | (0, 0, 0, 1, 1) |  | 2.8 | 10.6 | 42.7 | 27.1 | 5.4 | 4.1 |
|  |  | (0, 0, 1, 0, 0) |  | 2.8 | 10.1 | 42.8 | 26.9 | 5.5 | 4.4 |
|  |  | (0, 0, 1, 0, 1) |  | 2.6 | 12.2 | 40.8 | 26.1 | 5.9 | 5.1 |
|  |  | (0, 0, 1, 1, 0) |  | 2.4 | 9.3 | 44.6 | 28.0 | 5.2 | 3.2 |
|  |  | (0, 0, 1, 1, 1) |  | 2.6 | 10.8 | 43.2 | 26.2 | 6.1 | 3.7 |
|  |  | (0, 1, 0, 0, 0) |  | 4.4 | 20.0 | 44.1 | 17.8 | 3.3 | 2.9 |
|  |  | (0, 1, 0, 0, 1) |  | 4.3 | 21.0 | 43.6 | 17.3 | 2.8 | 3.3 |
|  |  | (0, 1, 0, 1, 0) |  | 3.6 | 20.7 | 45.5 | 17.8 | 2.7 | 2.3 |
|  |  | (0, 1, 0, 1, 1) |  | 3.6 | 22.4 | 44.3 | 16.8 | 2.8 | 2.6 |
|  |  | (0, 1, 1, 0, 0) |  | 4.3 | 20.4 | 44.5 | 17.4 | 3.2 | 2.8 |
|  |  | (0, 1, 1, 0, 1) |  | 4.5 | 21.4 | 43.3 | 16.9 | 3.2 | 3.3 |
|  |  | (0, 1, 1, 1, 0) |  | 3.6 | 21.0 | 46.2 | 16.9 | 3.1 | 1.8 |
|  |  | (0, 1, 1, 1, 1) |  | 3.7 | 22.4 | 44.4 | 16.1 | 3.3 | 2.5 |
|  |  | (1, 0, 0, 0, 0) | 1 | 21.2 | 33.7 | 24.0 | 7.3 | 1.0 | 1.1 |
|  |  | (1, 0, 0, 0, 1) |  | 22.0 | 33.1 | 23.8 | 7.0 | 1.0 | 1.4 |
|  |  | (1, 0, 0, 1, 0) |  | 20.3 | 36.2 | 23.7 | 6.7 | 0.7 | 0.8 |
|  |  | (1, 0, 0, 1, 1) |  | 21.7 | 35.3 | 23.4 | 6.4 | 0.9 | 0.9 |
|  |  | (1, 0, 1, 0, 0) |  | 20.9 | 34.0 | 23.5 | 7.2 | 1.4 | 1.2 |
|  |  | (1, 0, 1, 0, 1) |  | 21.3 | 33.8 | 23.6 | 7.0 | 1.1 | 1.6 |
|  |  | (1, 0, 1, 1, 0) |  | 20.6 | 36.2 | 23.6 | 6.4 | 0.7 | 0.9 |
|  |  | (1, 0, 1, 1, 1) |  | 20.7 | 35.4 | 24.0 | 6.6 | 0.8 | 1.1 |
|  |  | (1, 1, 0, 0, 0) |  | 28.0 | 31.8 | 17.7 | 4.2 | 0.7 | 0.7 |
|  |  | (1, 1, 0, 0, 1) |  | 29.5 | 30.7 | 16.7 | 4.6 | 0.7 | 0.9 |
|  |  | (1, 1, 0, 1, 0) |  | 28.4 | 33.2 | 16.3 | 4.3 | 0.5 | 0.4 |
|  |  | (1, 1, 0, 1, 1) |  | 29.9 | 31.5 | 16.4 | 4.4 | 0.6 | 0.4 |
|  |  | (1, 1, 1, 0, 0) |  | 28.8 | 31.7 | 16.5 | 4.8 | 0.6 | 0.7 |
|  |  | (1, 1, 1, 0, 1) |  | 29.3 | 31.7 | 15.8 | 5.0 | 0.7 | 0.9 |
|  |  | (1, 1, 1, 1, 0) |  | 29.8 | 32.2 | 16.6 | 4.3 | 0.4 | 0.4 |
|  |  | (1, 1, 1, 1, 1) |  | 30.4 | 32.1 | 16.0 | 4.6 | 0.5 | 0.4 |
|  | 4 | (0, 0, 0, 0, 0) | 3 | 12.5 | 33.5 | 33.4 | 11.7 | 4.0 | 3.6 |
|  |  | (0, 0, 0, 0, 1) |  | 13.5 | 32.9 | 33.0 | 11.2 | 4.1 | 4.0 |
|  |  | (0, 0, 0, 1, 0) |  | 12.1 | 33.6 | 34.7 | 11.5 | 3.5 | 3.3 |
|  |  | (0, 0, 0, 1, 1) |  | 12.4 | 32.7 | 35.0 | 11.3 | 3.3 | 4.0 |
|  |  | (0, 0, 1, 0, 0) |  | 12.2 | 33.9 | 33.5 | 11.5 | 3.9 | 3.8 |
|  |  | (0, 0, 1, 0, 1) |  | 12.9 | 33.4 | 33.3 | 11.5 | 3.7 | 3.7 |
|  |  | (0, 0, 1, 1, 0) |  | 11.8 | 33.5 | 35.1 | 11.3 | 3.7 | 3.4 |
|  |  | (0, 0, 1, 1, 1) |  | 12.4 | 33.4 | 34.9 | 11.1 | 3.4 | 3.5 |
|  |  | (0, 1, 0, 0, 0) |  | 14.1 | 35.9 | 32.9 | 10.0 | 2.9 | 2.7 |
|  |  | (0, 1, 0, 0, 1) |  | 14.6 | 36.2 | 31.6 | 10.0 | 3.1 | 3.0 |
|  |  | (0, 1, 0, 1, 0) |  | 13.4 | 37.3 | 33.2 | 10.0 | 2.7 | 2.0 |
|  |  | (0, 1, 0, 1, 1) |  | 13.5 | 37.1 | 33.5 | 9.4 | 2.8 | 2.4 |
|  |  | (0, 1, 1, 0, 0) |  | 13.7 | 37.1 | 32.3 | 9.7 | 2.9 | 2.9 |
|  |  | (0, 1, 1, 0, 1) |  | 14.2 | 36.6 | 31.7 | 10.0 | 2.8 | 3.2 |
|  |  | (0, 1, 1, 1, 0) |  | 13.4 | 37.9 | 32.2 | 10.1 | 2.7 | 2.4 |
|  |  | (0, 1, 1, 1, 1) |  | 13.5 | 37.7 | 32.0 | 9.8 | 3.0 | 2.6 |
|  |  | (1, 0, 0, 0, 0) | 2 | 17.5 | 41.1 | 28.7 | 7.9 | 1.7 | 1.9 |
|  |  | (1, 0, 0, 0, 1) |  | 17.8 | 40.0 | 29.1 | 7.5 | 2.3 | 1.9 |
|  |  | (1, 0, 0, 1, 0) |  | 16.6 | 41.7 | 29.7 | 7.3 | 1.8 | 1.5 |
|  |  | (1, 0, 0, 1, 1) |  | 16.8 | 40.7 | 30.6 | 6.9 | 1.8 | 1.7 |
|  |  | (1, 0, 1, 0, 0) |  | 16.8 | 42.0 | 28.2 | 7.8 | 1.8 | 2.0 |
|  |  | (1, 0, 1, 0, 1) |  | 17.3 | 40.9 | 28.4 | 7.7 | 1.9 | 2.1 |
|  |  | (1, 0, 1, 1, 0) |  | 16.4 | 42.8 | 28.1 | 7.5 | 1.7 | 2.0 |
|  |  | (1, 0, 1, 1, 1) |  | 16.9 | 41.6 | 29.7 | 7.0 | 1.3 | 2.0 |
|  |  | (1, 1, 0, 0, 0) |  | 21.2 | 42.4 | 25.8 | 6.0 | 1.4 | 1.5 |
|  |  | (1, 1, 0, 0, 1) |  | 21.3 | 41.4 | 26.3 | 5.8 | 1.7 | 1.6 |
|  |  | (1, 1, 0, 1, 0) |  | 21.0 | 44.0 | 25.6 | 5.4 | 1.3 | 1.2 |
|  |  | (1, 1, 0, 1, 1) |  | 20.7 | 43.1 | 26.4 | 5.3 | 1.6 | 1.4 |
|  |  | (1, 1, 1, 0, 0) |  | 21.6 | 42.0 | 25.7 | 5.6 | 1.6 | 1.6 |
|  |  | (1, 1, 1, 0, 1) |  | 20.9 | 42.5 | 25.3 | 5.6 | 2.1 | 1.6 |
|  |  | (1, 1, 1, 1, 0) |  | 20.7 | 43.9 | 25.5 | 5.5 | 1.4 | 1.3 |
|  |  | (1, 1, 1, 1, 1) |  | 20.7 | 43.4 | 25.4 | 5.8 | 1.3 | 1.6 |
|  | 5 | (0, 0, 0, 0, 0) | 3 | 4.3 | 42.2 | 47.4 | 4.2 | 0.8 | 0.3 |
|  |  | (0, 0, 0, 0, 1) |  | 4.2 | 41.5 | 47.7 | 4.8 | 0.6 | 0.4 |
|  |  | (0, 0, 0, 1, 0) |  | 4.0 | 42.6 | 48.0 | 3.9 | 0.5 | 0.3 |
|  |  | (0, 0, 0, 1, 1) |  | 4.3 | 41.8 | 48.4 | 4.0 | 0.5 | 0.3 |
|  |  | (0, 0, 1, 0, 0) |  | 4.1 | 42.5 | 47.6 | 4.1 | 0.6 | 0.3 |
|  |  | (0, 0, 1, 0, 1) |  | 4.1 | 42.2 | 47.9 | 4.2 | 0.6 | 0.2 |
|  |  | (0, 0, 1, 1, 0) |  | 3.9 | 42.5 | 48.4 | 3.7 | 0.4 | 0.3 |
|  |  | (0, 0, 1, 1, 1) |  | 3.8 | 42.5 | 48.4 | 3.9 | 0.4 | 0.2 |
|  |  | (0, 1, 0, 0, 0) |  | 4.4 | 41.8 | 48.5 | 3.8 | 0.4 | 0.4 |
|  |  | (0, 1, 0, 0, 1) |  | 4.5 | 41.2 | 48.1 | 4.6 | 0.5 | 0.3 |
|  |  | (0, 1, 0, 1, 0) |  | 3.6 | 42.9 | 48.3 | 3.8 | 0.4 | 0.3 |
|  |  | (0, 1, 0, 1, 1) |  | 3.9 | 42.1 | 48.8 | 3.9 | 0.4 | 0.2 |
|  |  | (0, 1, 1, 0, 0) |  | 4.2 | 41.9 | 48.2 | 4.1 | 0.6 | 0.3 |
|  |  | (0, 1, 1, 0, 1) |  | 4.3 | 41.7 | 48.2 | 4.3 | 0.5 | 0.3 |
|  |  | (0, 1, 1, 1, 0) |  | 3.7 | 42.8 | 48.5 | 3.7 | 0.3 | 0.3 |
|  |  | (0, 1, 1, 1, 1) |  | 4.0 | 42.3 | 48.5 | 3.9 | 0.4 | 0.2 |
|  |  | (1, 0, 0, 0, 0) |  | 4.3 | 41.0 | 48.9 | 4.2 | 0.5 | 0.3 |
|  |  | (1, 0, 0, 0, 1) |  | 4.4 | 40.6 | 48.4 | 4.8 | 0.6 | 0.3 |
|  |  | (1, 0, 0, 1, 0) |  | 3.9 | 41.3 | 50.1 | 3.2 | 0.5 | 0.2 |
|  |  | (1, 0, 0, 1, 1) |  | 4.2 | 41.2 | 49.3 | 3.7 | 0.6 | 0.2 |
|  |  | (1, 0, 1, 0, 0) |  | 4.3 | 41.3 | 48.6 | 4.1 | 0.6 | 0.4 |
|  |  | (1, 0, 1, 0, 1) |  | 4.2 | 41.2 | 48.7 | 4.1 | 0.8 | 0.3 |
|  |  | (1, 0, 1, 1, 0) |  | 3.8 | 41.7 | 49.6 | 3.4 | 0.4 | 0.3 |
|  |  | (1, 0, 1, 1, 1) |  | 3.9 | 41.8 | 49.3 | 3.4 | 0.6 | 0.3 |
|  |  | (1, 1, 0, 0, 0) |  | 4.5 | 41.6 | 47.8 | 4.4 | 0.5 | 0.4 |
|  |  | (1, 1, 0, 0, 1) |  | 4.7 | 41.2 | 47.3 | 5.3 | 0.5 | 0.3 |
|  |  | (1, 1, 0, 1, 0) |  | 4.1 | 41.8 | 48.9 | 3.7 | 0.4 | 0.3 |
|  |  | (1, 1, 0, 1, 1) |  | 4.1 | 42.0 | 48.3 | 4.2 | 0.5 | 0.2 |
|  |  | (1, 1, 1, 0, 0) |  | 4.3 | 42.1 | 47.5 | 4.2 | 0.7 | 0.5 |
|  |  | (1, 1, 1, 0, 1) |  | 4.5 | 41.8 | 47.4 | 4.5 | 0.6 | 0.5 |
|  |  | (1, 1, 1, 1, 0) |  | 4.0 | 42.6 | 48.3 | 3.6 | 0.5 | 0.3 |
|  |  | (1, 1, 1, 1, 1) |  | 4.3 | 42.5 | 47.8 | 3.9 | 0.5 | 0.3 |
|  | 6 | (0, 0, 0, 0, 0) | 5 | 10.0 | 1.8 | 9.2 | 22.4 | 22.7 | 33.9 |
|  |  | (0, 0, 0, 0, 1) |  | 10.1 | 2.1 | 10.1 | 22.4 | 21.7 | 33.4 |
|  |  | (0, 0, 0, 1, 0) |  | 10.0 | 1.5 | 8.4 | 24.3 | 23.4 | 32.3 |
|  |  | (0, 0, 0, 1, 1) |  | 10.2 | 2.1 | 9.2 | 22.8 | 23.4 | 32.2 |
|  |  | (0, 0, 1, 0, 0) |  | 10.0 | 1.8 | 8.6 | 23.1 | 23.0 | 33.5 |
|  |  | (0, 0, 1, 0, 1) |  | 9.8 | 2.3 | 9.6 | 22.8 | 21.8 | 33.6 |
|  |  | (0, 0, 1, 1, 0) |  | 9.9 | 1.6 | 8.9 | 24.1 | 23.8 | 31.5 |
|  |  | (0, 0, 1, 1, 1) |  | 9.8 | 2.2 | 9.4 | 23.1 | 24.0 | 31.4 |
|  |  | (0, 1, 0, 0, 0) | 3 | 9.9 | 2.9 | 13.0 | 27.0 | 22.7 | 24.5 |
|  |  | (0, 1, 0, 0, 1) |  | 10.1 | 3.4 | 13.2 | 27.4 | 21.4 | 24.4 |
|  |  | (0, 1, 0, 1, 0) |  | 9.7 | 2.7 | 12.6 | 29.4 | 23.6 | 21.9 |
|  |  | (0, 1, 0, 1, 1) |  | 9.9 | 3.2 | 12.8 | 28.3 | 23.2 | 22.4 |
|  |  | (0, 1, 1, 0, 0) |  | 10.0 | 2.7 | 12.6 | 28.7 | 22.6 | 23.3 |
|  |  | (0, 1, 1, 0, 1) |  | 9.6 | 3.2 | 13.8 | 26.7 | 21.9 | 24.6 |
|  |  | (0, 1, 1, 1, 0) |  | 9.7 | 2.5 | 12.9 | 30.2 | 21.9 | 22.7 |
|  |  | (0, 1, 1, 1, 1) |  | 9.8 | 3.4 | 13.3 | 28.8 | 22.8 | 21.8 |
|  |  | (1, 0, 0, 0, 0) | 3 | 10.3 | 2.9 | 13.3 | 26.9 | 21.8 | 24.6 |
|  |  | (1, 0, 0, 0, 1) |  | 10.3 | 3.6 | 13.0 | 27.0 | 21.2 | 24.6 |
|  |  | (1, 0, 0, 1, 0) |  | 10.0 | 2.4 | 13.0 | 30.3 | 22.0 | 22.2 |
|  |  | (1, 0, 0, 1, 1) |  | 10.0 | 3.0 | 13.1 | 29.3 | 22.2 | 22.2 |
|  |  | (1, 0, 1, 0, 0) |  | 10.3 | 2.8 | 13.1 | 27.2 | 22.8 | 23.7 |
|  |  | (1, 0, 1, 0, 1) |  | 10.2 | 3.1 | 13.8 | 27.0 | 21.3 | 24.4 |
|  |  | (1, 0, 1, 1, 0) |  | 10.0 | 2.5 | 13.2 | 29.7 | 21.9 | 22.5 |
|  |  | (1, 0, 1, 1, 1) |  | 10.0 | 3.2 | 13.3 | 29.8 | 21.1 | 22.4 |
|  |  | (1, 1, 0, 0, 0) | 1 | 10.7 | 5.2 | 18.8 | 29.8 | 18.7 | 16.6 |
|  |  | (1, 1, 0, 0, 1) |  | 10.6 | 5.7 | 18.9 | 29.1 | 18.5 | 17.0 |
|  |  | (1, 1, 0, 1, 0) |  | 10.3 | 4.8 | 20.7 | 31.2 | 17.6 | 15.3 |
|  |  | (1, 1, 0, 1, 1) |  | 10.4 | 5.7 | 19.3 | 30.9 | 17.6 | 16.0 |
|  |  | (1, 1, 1, 0, 0) |  | 10.9 | 4.9 | 19.2 | 30.3 | 17.8 | 16.7 |
|  |  | (1, 1, 1, 0, 1) |  | 10.8 | 5.8 | 18.4 | 28.8 | 18.7 | 17.2 |
|  |  | (1, 1, 1, 1, 0) |  | 10.3 | 5.0 | 20.3 | 31.0 | 17.8 | 15.4 |
|  |  | (1, 1, 1, 1, 1) |  | 10.3 | 5.7 | 20.3 | 29.0 | 18.7 | 15.8 |
|  | 7 | (0, 0, 0, 0, 0) | 4 | 6.9 | 1.5 | 17.8 | 50.6 | 20.5 | 2.8 |
|  |  | (0, 0, 0, 0, 1) |  | 7.2 | 1.8 | 18.6 | 48.7 | 20.3 | 3.5 |
|  |  | (0, 0, 0, 1, 0) |  | 6.7 | 0.8 | 17.4 | 55.0 | 18.2 | 2.0 |
|  |  | (0, 0, 0, 1, 1) |  | 6.8 | 1.4 | 18.7 | 51.9 | 18.7 | 2.6 |
|  |  | (0, 0, 1, 0, 0) |  | 6.9 | 1.2 | 18.3 | 50.8 | 20.1 | 2.8 |
|  |  | (0, 0, 1, 0, 1) |  | 7.3 | 1.5 | 19.8 | 47.3 | 20.8 | 3.4 |
|  |  | (0, 0, 1, 1, 0) |  | 6.2 | 0.8 | 17.6 | 55.0 | 18.4 | 2.1 |
|  |  | (0, 0, 1, 1, 1) |  | 6.7 | 1.4 | 18.4 | 51.4 | 19.4 | 2.9 |
|  |  | (0, 1, 0, 0, 0) | 5 | 24.5 | 0.8 | 5.8 | 35.8 | 26.5 | 6.8 |
|  |  | (0, 1, 0, 0, 1) |  | 24.5 | 1.3 | 6.7 | 34.7 | 25.3 | 7.8 |
|  |  | (0, 1, 0, 1, 0) |  | 24.2 | 0.6 | 5.4 | 36.7 | 27.7 | 5.5 |
|  |  | (0, 1, 0, 1, 1) |  | 24.4 | 1.0 | 6.9 | 35.1 | 26.3 | 6.5 |
|  |  | (0, 1, 1, 0, 0) |  | 23.2 | 1.0 | 7.1 | 35.7 | 26.3 | 6.9 |
|  |  | (0, 1, 1, 0, 1) |  | 23.4 | 1.1 | 7.1 | 34.6 | 26.7 | 7.2 |
|  |  | (0, 1, 1, 1, 0) |  | 22.7 | 0.7 | 6.1 | 38.0 | 27.6 | 5.1 |
|  |  | (0, 1, 1, 1, 1) |  | 22.7 | 1.0 | 6.4 | 36.1 | 27.3 | 6.6 |
|  |  | (1, 0, 0, 0, 0) | 5 | 24.7 | 0.8 | 7.3 | 32.8 | 28.3 | 6.2 |
|  |  | (1, 0, 0, 0, 1) |  | 25.1 | 1.3 | 7.0 | 33.6 | 26.5 | 6.7 |
|  |  | (1, 0, 0, 1, 0) |  | 24.3 | 0.7 | 5.9 | 35.6 | 28.5 | 5.2 |
|  |  | (1, 0, 0, 1, 1) |  | 24.6 | 1.0 | 6.5 | 35.2 | 26.9 | 6.0 |
|  |  | (1, 0, 1, 0, 0) |  | 24.3 | 0.9 | 7.2 | 34.2 | 27.5 | 6.0 |
|  |  | (1, 0, 1, 0, 1) |  | 24.8 | 0.9 | 7.0 | 34.6 | 26.5 | 6.3 |
|  |  | (1, 0, 1, 1, 0) |  | 23.8 | 0.3 | 6.9 | 35.5 | 28.3 | 5.4 |
|  |  | (1, 0, 1, 1, 1) |  | 24.1 | 0.7 | 6.9 | 35.4 | 27.3 | 5.7 |
|  |  | (1, 1, 0, 0, 0) | 1 | 47.8 | 0.7 | 2.6 | 16.5 | 24.2 | 8.3 |
|  |  | (1, 1, 0, 0, 1) |  | 47.7 | 0.8 | 2.8 | 17.0 | 23.5 | 8.4 |
|  |  | (1, 1, 0, 1, 0) |  | 49.3 | 0.7 | 2.5 | 16.1 | 24.7 | 6.8 |
|  |  | (1, 1, 0, 1, 1) |  | 48.5 | 0.6 | 3.2 | 16.5 | 24.1 | 7.2 |
|  |  | (1, 1, 1, 0, 0) |  | 47.7 | 0.6 | 2.7 | 16.5 | 25.3 | 7.4 |
|  |  | (1, 1, 1, 0, 1) |  | 47.5 | 0.8 | 2.9 | 16.8 | 24.1 | 8.0 |
|  |  | (1, 1, 1, 1, 0) |  | 48.4 | 0.4 | 3.3 | 15.9 | 25.4 | 6.8 |
|  |  | (1, 1, 1, 1, 1) |  | 47.8 | 0.8 | 3.3 | 16.5 | 24.2 | 7.5 |

| Method | Scenario | ***x*** | IOD | Dose level | | | | | |
| --- | --- | --- | --- | --- | --- | --- | --- | --- | --- |
| 1 | 2 | 3 | 4 | 5 | 6 |
| Proposed M1 | 1 | (0, 0, 0, 0, 0) | 6 | 27.8 | 1.0 | 5.1 | 6.0 | 9.2 | 50.9 |
|  |  | (0, 0, 0, 0, 1) |  | 28.1 | 1.4 | 5.2 | 7.2 | 8.6 | 49.5 |
|  |  | (0, 0, 0, 1, 0) |  | 27.8 | 1.1 | 5.2 | 5.9 | 9.4 | 50.7 |
|  |  | (0, 0, 0, 1, 1) |  | 27.9 | 1.4 | 5.7 | 6.7 | 8.4 | 50.1 |
|  |  | (0, 0, 1, 0, 0) |  | 27.7 | 0.9 | 4.6 | 6.8 | 9.7 | 50.4 |
|  |  | (0, 0, 1, 0, 1) |  | 28.1 | 1.1 | 4.7 | 7.0 | 10.2 | 49.0 |
|  |  | (0, 0, 1, 1, 0) |  | 27.3 | 1.0 | 4.6 | 7.1 | 9.9 | 50.2 |
|  |  | (0, 0, 1, 1, 1) |  | 27.6 | 1.4 | 4.5 | 7.7 | 10.2 | 48.7 |
|  |  | (0, 1, 0, 0, 0) |  | 27.6 | 1.3 | 6.3 | 9.9 | 11.2 | 43.7 |
|  |  | (0, 1, 0, 0, 1) |  | 28.0 | 1.6 | 7.1 | 10.3 | 10.7 | 42.3 |
|  |  | (0, 1, 0, 1, 0) |  | 27.5 | 1.3 | 6.0 | 9.5 | 12.7 | 43.1 |
|  |  | (0, 1, 0, 1, 1) |  | 27.8 | 1.8 | 6.6 | 10.3 | 12.4 | 41.3 |
|  |  | (0, 1, 1, 0, 0) |  | 27.7 | 1.4 | 5.6 | 9.6 | 12.3 | 43.4 |
|  |  | (0, 1, 1, 0, 1) |  | 27.9 | 1.7 | 5.7 | 10.5 | 12.4 | 41.9 |
|  |  | (0, 1, 1, 1, 0) |  | 27.2 | 1.3 | 5.3 | 10.7 | 11.8 | 43.7 |
|  |  | (0, 1, 1, 1, 1) |  | 27.6 | 1.5 | 6.1 | 10.8 | 12.5 | 41.4 |
|  |  | (1, 0, 0, 0, 0) | 4 | 28.2 | 4.3 | 14.7 | 17.4 | 13.6 | 21.4 |
|  |  | (1, 0, 0, 0, 1) |  | 28.4 | 4.8 | 14.6 | 17.7 | 13.4 | 20.6 |
|  |  | (1, 0, 0, 1, 0) |  | 27.8 | 4.9 | 14.7 | 19.0 | 13.9 | 19.4 |
|  |  | (1, 0, 0, 1, 1) |  | 28.4 | 5.0 | 14.6 | 19.4 | 13.3 | 19.1 |
|  |  | (1, 0, 1, 0, 0) |  | 28.0 | 4.8 | 12.9 | 18.9 | 14.4 | 20.6 |
|  |  | (1, 0, 1, 0, 1) |  | 28.6 | 4.7 | 13.8 | 19.7 | 12.5 | 20.4 |
|  |  | (1, 0, 1, 1, 0) |  | 27.8 | 4.5 | 14.6 | 19.3 | 14.0 | 19.6 |
|  |  | (1, 0, 1, 1, 1) |  | 28.5 | 4.7 | 14.3 | 20.2 | 13.5 | 18.8 |
|  |  | (1, 1, 0, 0, 0) |  | 28.3 | 6.7 | 18.8 | 21.3 | 12.3 | 12.0 |
|  |  | (1, 1, 0, 0, 1) |  | 28.8 | 6.8 | 19.3 | 20.1 | 13.1 | 11.4 |
|  |  | (1, 1, 0, 1, 0) |  | 27.8 | 7.2 | 20.7 | 22.9 | 12.5 | 8.5 |
|  |  | (1, 1, 0, 1, 1) |  | 28.2 | 7.5 | 20.1 | 22.8 | 11.4 | 9.8 |
|  |  | (1, 1, 1, 0, 0) |  | 28.2 | 7.3 | 18.3 | 22.2 | 12.1 | 11.7 |
|  |  | (1, 1, 1, 0, 1) |  | 28.6 | 7.0 | 20.2 | 20.3 | 11.4 | 12.1 |
|  |  | (1, 1, 1, 1, 0) |  | 27.6 | 6.7 | 21.3 | 23.2 | 11.8 | 9.1 |
|  |  | (1, 1, 1, 1, 1) |  | 28.1 | 7.6 | 19.8 | 22.1 | 12.0 | 10.2 |
|  | 2 | (0, 0, 0, 0, 0) | 6 | 9.7 | 4.6 | 6.2 | 5.5 | 5.0 | 31.9 |
|  |  | (0, 0, 0, 0, 1) |  | 10.2 | 5.5 | 5.5 | 5.9 | 4.7 | 31.2 |
|  |  | (0, 0, 0, 1, 0) |  | 9.1 | 5.2 | 5.8 | 5.3 | 6.0 | 31.8 |
|  |  | (0, 0, 0, 1, 1) |  | 9.9 | 5.3 | 5.8 | 5.8 | 5.4 | 30.9 |
|  |  | (0, 0, 1, 0, 0) |  | 9.6 | 4.6 | 6.7 | 5.8 | 5.2 | 31.2 |
|  |  | (0, 0, 1, 0, 1) |  | 10.2 | 5.5 | 5.9 | 5.4 | 4.8 | 30.9 |
|  |  | (0, 0, 1, 1, 0) |  | 9.4 | 4.4 | 6.5 | 6.4 | 5.7 | 30.8 |
|  |  | (0, 0, 1, 1, 1) |  | 9.7 | 5.3 | 5.7 | 6.8 | 4.9 | 30.4 |
|  |  | (0, 1, 0, 0, 0) |  | 11.6 | 6.3 | 7.1 | 5.1 | 5.0 | 26.8 |
|  |  | (0, 1, 0, 0, 1) |  | 11.8 | 6.7 | 6.5 | 5.8 | 4.1 | 26.3 |
|  |  | (0, 1, 0, 1, 0) |  | 11.1 | 7.2 | 7.2 | 5.6 | 4.7 | 26.4 |
|  |  | (0, 1, 0, 1, 1) |  | 11.5 | 7.0 | 7.0 | 6.0 | 4.6 | 25.9 |
|  |  | (0, 1, 1, 0, 0) |  | 11.1 | 7.4 | 6.9 | 5.7 | 4.5 | 26.3 |
|  |  | (0, 1, 1, 0, 1) |  | 11.4 | 7.0 | 6.5 | 6.0 | 3.8 | 26.3 |
|  |  | (0, 1, 1, 1, 0) |  | 11.5 | 6.9 | 7.3 | 6.4 | 4.5 | 25.9 |
|  |  | (0, 1, 1, 1, 1) |  | 12.1 | 6.8 | 6.5 | 6.7 | 3.9 | 25.7 |
|  |  | (1, 0, 0, 0, 0) | No IOD | 12.6 | 3.7 | 0.9 | 0.9 | 0.3 | 1.4 |
|  |  | (1, 0, 0, 0, 1) |  | 12.6 | 3.9 | 1.2 | 0.6 | 0.3 | 1.8 |
|  |  | (1, 0, 0, 1, 0) |  | 13.4 | 3.4 | 0.9 | 0.5 | 0.2 | 1.3 |
|  |  | (1, 0, 0, 1, 1) |  | 12.9 | 4.5 | 1.2 | 0.3 | 0.2 | 1.3 |
|  |  | (1, 0, 1, 0, 0) |  | 13.1 | 3.9 | 0.7 | 0.5 | 0.2 | 1.4 |
|  |  | (1, 0, 1, 0, 1) |  | 12.6 | 3.7 | 1.5 | 0.5 | 0.3 | 1.6 |
|  |  | (1, 0, 1, 1, 0) |  | 13.4 | 3.6 | 0.8 | 0.3 | 0.1 | 1.0 |
|  |  | (1, 0, 1, 1, 1) |  | 13.8 | 3.8 | 1.3 | 0.2 | 0.2 | 1.4 |
|  |  | (1, 1, 0, 0, 0) |  | 7.7 | 1.3 | 0.1 | 0.0 | 0.1 | 0.2 |
|  |  | (1, 1, 0, 0, 1) |  | 8.9 | 1.4 | 0.7 | 0.3 | 0.1 | 0.7 |
|  |  | (1, 1, 0, 1, 0) |  | 6.6 | 0.4 | 0.0 | 0.0 | 0.0 | 0.2 |
|  |  | (1, 1, 0, 1, 1) |  | 7.9 | 1.4 | 0.2 | 0.0 | 0.1 | 0.3 |
|  |  | (1, 1, 1, 0, 0) |  | 8.3 | 0.9 | 0.2 | 0.1 | 0.1 | 0.4 |
|  |  | (1, 1, 1, 0, 1) |  | 9.4 | 1.6 | 0.5 | 0.0 | 0.1 | 1.0 |
|  |  | (1, 1, 1, 1, 0) |  | 7.0 | 0.6 | 0.1 | 0.0 | 0.0 | 0.1 |
|  |  | (1, 1, 1, 1, 1) |  | 9.0 | 1.4 | 0.1 | 0.1 | 0.1 | 0.5 |
|  | 3 | (0, 0, 0, 0, 0) | 4 | 11.3 | 9.3 | 34.2 | 26.2 | 9.1 | 4.8 |
|  |  | (0, 0, 0, 0, 1) |  | 11.7 | 10.6 | 33.3 | 25.4 | 8.3 | 5.5 |
|  |  | (0, 0, 0, 1, 0) |  | 11.1 | 8.8 | 35.1 | 28.4 | 8.2 | 3.3 |
|  |  | (0, 0, 0, 1, 1) |  | 11.4 | 10.3 | 35.1 | 25.4 | 8.3 | 4.2 |
|  |  | (0, 0, 1, 0, 0) |  | 11.5 | 9.2 | 34.1 | 26.4 | 9.1 | 4.5 |
|  |  | (0, 0, 1, 0, 1) |  | 11.9 | 10.3 | 33.6 | 24.7 | 8.9 | 5.4 |
|  |  | (0, 0, 1, 1, 0) |  | 11.2 | 8.6 | 35.3 | 28.2 | 8.2 | 3.3 |
|  |  | (0, 0, 1, 1, 1) |  | 11.5 | 9.8 | 35.6 | 25.9 | 7.8 | 4.3 |
|  |  | (0, 1, 0, 0, 0) |  | 13.8 | 19.2 | 32.6 | 18.5 | 5.9 | 4.3 |
|  |  | (0, 1, 0, 0, 1) |  | 14.9 | 19.2 | 32.0 | 18.4 | 5.0 | 4.8 |
|  |  | (0, 1, 0, 1, 0) |  | 13.3 | 18.6 | 35.3 | 18.7 | 5.5 | 3.2 |
|  |  | (0, 1, 0, 1, 1) |  | 14.5 | 19.4 | 32.5 | 19.1 | 5.4 | 3.6 |
|  |  | (0, 1, 1, 0, 0) |  | 14.2 | 18.2 | 33.2 | 18.9 | 5.4 | 4.6 |
|  |  | (0, 1, 1, 0, 1) |  | 14.8 | 18.5 | 33.2 | 17.9 | 4.7 | 5.1 |
|  |  | (0, 1, 1, 1, 0) |  | 13.0 | 18.9 | 35.4 | 18.7 | 4.8 | 3.7 |
|  |  | (0, 1, 1, 1, 1) |  | 13.7 | 19.5 | 34.0 | 18.3 | 4.9 | 4.0 |
|  |  | (1, 0, 0, 0, 0) | 1 | 29.5 | 30.1 | 18.1 | 5.7 | 1.5 | 0.8 |
|  |  | (1, 0, 0, 0, 1) |  | 30.2 | 29.4 | 18.6 | 5.5 | 1.2 | 1.0 |
|  |  | (1, 0, 0, 1, 0) |  | 28.5 | 32.7 | 17.8 | 4.6 | 1.2 | 0.8 |
|  |  | (1, 0, 0, 1, 1) |  | 29.3 | 31.7 | 18.0 | 5.3 | 1.0 | 0.7 |
|  |  | (1, 0, 1, 0, 0) |  | 29.0 | 31.8 | 17.9 | 5.1 | 1.2 | 1.0 |
|  |  | (1, 0, 1, 0, 1) |  | 29.6 | 31.3 | 17.3 | 5.8 | 1.7 | 0.6 |
|  |  | (1, 0, 1, 1, 0) |  | 28.7 | 33.0 | 18.5 | 4.7 | 1.0 | 0.8 |
|  |  | (1, 0, 1, 1, 1) |  | 29.7 | 31.9 | 17.7 | 5.0 | 1.1 | 0.8 |
|  |  | (1, 1, 0, 0, 0) |  | 34.8 | 27.7 | 12.2 | 2.4 | 0.8 | 0.7 |
|  |  | (1, 1, 0, 0, 1) |  | 36.5 | 26.8 | 11.8 | 2.9 | 0.7 | 0.7 |
|  |  | (1, 1, 0, 1, 0) |  | 35.7 | 28.5 | 10.8 | 2.2 | 0.5 | 0.4 |
|  |  | (1, 1, 0, 1, 1) |  | 36.7 | 26.8 | 12.1 | 2.4 | 0.7 | 0.4 |
|  |  | (1, 1, 1, 0, 0) |  | 34.6 | 28.5 | 11.6 | 3.0 | 0.6 | 0.8 |
|  |  | (1, 1, 1, 0, 1) |  | 35.7 | 27.7 | 11.6 | 2.9 | 0.9 | 0.9 |
|  |  | (1, 1, 1, 1, 0) |  | 37.3 | 27.9 | 11.7 | 2.0 | 0.5 | 0.5 |
|  |  | (1, 1, 1, 1, 1) |  | 36.3 | 28.3 | 11.5 | 2.4 | 0.6 | 0.6 |
|  | 4 | (0, 0, 0, 0, 0) | 3 | 10.6 | 34.6 | 46.2 | 5.3 | 0.9 | 0.2 |
|  |  | (0, 0, 0, 0, 1) |  | 10.8 | 35.7 | 43.9 | 5.9 | 1.0 | 0.7 |
|  |  | (0, 0, 0, 1, 0) |  | 9.5 | 36.9 | 45.7 | 5.3 | 0.5 | 0.1 |
|  |  | (0, 0, 0, 1, 1) |  | 10.0 | 36.8 | 44.6 | 5.3 | 1.0 | 0.3 |
|  |  | (0, 0, 1, 0, 0) |  | 10.6 | 36.0 | 44.8 | 5.4 | 0.8 | 0.4 |
|  |  | (0, 0, 1, 0, 1) |  | 11.0 | 36.1 | 43.4 | 6.0 | 1.0 | 0.4 |
|  |  | (0, 0, 1, 1, 0) |  | 10.0 | 37.0 | 45.1 | 5.1 | 0.6 | 0.1 |
|  |  | (0, 0, 1, 1, 1) |  | 10.6 | 37.6 | 42.9 | 5.8 | 0.9 | 0.2 |
|  |  | (0, 1, 0, 0, 0) |  | 13.1 | 38.5 | 41.0 | 4.0 | 0.7 | 0.5 |
|  |  | (0, 1, 0, 0, 1) |  | 13.3 | 39.0 | 39.3 | 4.6 | 1.0 | 0.5 |
|  |  | (0, 1, 0, 1, 0) |  | 11.3 | 41.1 | 40.6 | 4.0 | 0.6 | 0.2 |
|  |  | (0, 1, 0, 1, 1) |  | 12.2 | 41.0 | 39.1 | 4.4 | 0.9 | 0.3 |
|  |  | (0, 1, 1, 0, 0) |  | 13.1 | 40.4 | 39.4 | 4.1 | 0.7 | 0.3 |
|  |  | (0, 1, 1, 0, 1) |  | 13.4 | 39.3 | 39.2 | 4.6 | 1.1 | 0.2 |
|  |  | (0, 1, 1, 1, 0) |  | 12.1 | 41.6 | 39.1 | 4.0 | 0.5 | 0.6 |
|  |  | (0, 1, 1, 1, 1) |  | 12.7 | 40.5 | 38.9 | 4.5 | 0.7 | 0.6 |
|  |  | (1, 0, 0, 0, 0) | 2 | 18.3 | 40.9 | 33.8 | 2.9 | 0.7 | 0.2 |
|  |  | (1, 0, 0, 0, 1) |  | 18.6 | 40.8 | 33.7 | 2.9 | 0.6 | 0.3 |
|  |  | (1, 0, 0, 1, 0) |  | 17.9 | 42.8 | 33.5 | 2.2 | 0.5 | 0.3 |
|  |  | (1, 0, 0, 1, 1) |  | 18.3 | 41.7 | 33.6 | 2.7 | 0.6 | 0.3 |
|  |  | (1, 0, 1, 0, 0) |  | 18.7 | 41.4 | 33.6 | 2.5 | 0.4 | 0.3 |
|  |  | (1, 0, 1, 0, 1) |  | 18.8 | 41.5 | 33.1 | 3.1 | 0.3 | 0.1 |
|  |  | (1, 0, 1, 1, 0) |  | 18.2 | 43.3 | 32.8 | 2.1 | 0.4 | 0.3 |
|  |  | (1, 0, 1, 1, 1) |  | 18.4 | 42.2 | 32.7 | 2.7 | 0.6 | 0.3 |
|  |  | (1, 1, 0, 0, 0) |  | 23.9 | 41.4 | 28.6 | 2.2 | 0.4 | 0.3 |
|  |  | (1, 1, 0, 0, 1) |  | 23.4 | 41.3 | 28.6 | 2.4 | 0.5 | 0.6 |
|  |  | (1, 1, 0, 1, 0) |  | 23.8 | 43.8 | 26.7 | 2.0 | 0.4 | 0.3 |
|  |  | (1, 1, 0, 1, 1) |  | 23.2 | 42.8 | 27.6 | 2.5 | 0.4 | 0.5 |
|  |  | (1, 1, 1, 0, 0) |  | 24.3 | 42.2 | 27.6 | 2.0 | 0.4 | 0.2 |
|  |  | (1, 1, 1, 0, 1) |  | 23.2 | 41.6 | 28.7 | 1.8 | 0.8 | 0.2 |
|  |  | (1, 1, 1, 1, 0) |  | 23.9 | 44.3 | 26.7 | 1.7 | 0.4 | 0.2 |
|  |  | (1, 1, 1, 1, 1) |  | 23.2 | 43.5 | 27.0 | 2.4 | 0.4 | 0.4 |
|  | 5 | (0, 0, 0, 0, 0) | 3 | 26.0 | 39.8 | 31.1 | 2.6 | 0.2 | 0.2 |
|  |  | (0, 0, 0, 0, 1) |  | 26.5 | 39.7 | 30.1 | 2.9 | 0.3 | 0.4 |
|  |  | (0, 0, 0, 1, 0) |  | 25.0 | 42.3 | 30.6 | 1.7 | 0.2 | 0.1 |
|  |  | (0, 0, 0, 1, 1) |  | 25.9 | 40.9 | 30.5 | 2.0 | 0.3 | 0.4 |
|  |  | (0, 0, 1, 0, 0) |  | 25.8 | 40.4 | 30.8 | 2.6 | 0.2 | 0.3 |
|  |  | (0, 0, 1, 0, 1) |  | 25.9 | 40.6 | 29.8 | 2.9 | 0.4 | 0.3 |
|  |  | (0, 0, 1, 1, 0) |  | 25.1 | 41.8 | 31.2 | 1.4 | 0.2 | 0.2 |
|  |  | (0, 0, 1, 1, 1) |  | 25.7 | 41.3 | 30.5 | 2.0 | 0.4 | 0.2 |
|  |  | (0, 1, 0, 0, 0) |  | 26.6 | 39.9 | 30.3 | 2.5 | 0.5 | 0.2 |
|  |  | (0, 1, 0, 0, 1) |  | 26.8 | 39.3 | 30.0 | 2.8 | 0.4 | 0.5 |
|  |  | (0, 1, 0, 1, 0) |  | 25.5 | 42.1 | 30.6 | 1.3 | 0.2 | 0.2 |
|  |  | (0, 1, 0, 1, 1) |  | 25.7 | 41.4 | 29.9 | 1.9 | 0.3 | 0.4 |
|  |  | (0, 1, 1, 0, 0) |  | 26.2 | 40.7 | 29.7 | 2.8 | 0.3 | 0.3 |
|  |  | (0, 1, 1, 0, 1) |  | 26.3 | 40.4 | 29.4 | 2.9 | 0.4 | 0.4 |
|  |  | (0, 1, 1, 1, 0) |  | 25.2 | 42.1 | 30.9 | 1.3 | 0.1 | 0.3 |
|  |  | (0, 1, 1, 1, 1) |  | 25.8 | 41.2 | 30.5 | 1.7 | 0.3 | 0.3 |
|  |  | (1, 0, 0, 0, 0) |  | 25.3 | 40.0 | 30.8 | 3.3 | 0.3 | 0.3 |
|  |  | (1, 0, 0, 0, 1) |  | 26.1 | 39.3 | 30.3 | 3.4 | 0.3 | 0.5 |
|  |  | (1, 0, 0, 1, 0) |  | 24.8 | 41.0 | 31.8 | 1.8 | 0.3 | 0.3 |
|  |  | (1, 0, 0, 1, 1) |  | 25.3 | 40.9 | 30.4 | 2.5 | 0.3 | 0.4 |
|  |  | (1, 0, 1, 0, 0) |  | 25.5 | 39.9 | 31.1 | 2.6 | 0.4 | 0.4 |
|  |  | (1, 0, 1, 0, 1) |  | 25.9 | 39.7 | 30.0 | 3.2 | 0.6 | 0.3 |
|  |  | (1, 0, 1, 1, 0) |  | 25.0 | 40.8 | 31.6 | 2.0 | 0.2 | 0.3 |
|  |  | (1, 0, 1, 1, 1) |  | 25.4 | 40.8 | 30.3 | 2.4 | 0.6 | 0.4 |
|  |  | (1, 1, 0, 0, 0) |  | 25.8 | 40.2 | 30.7 | 2.5 | 0.4 | 0.4 |
|  |  | (1, 1, 0, 0, 1) |  | 26.4 | 39.8 | 29.7 | 2.9 | 0.6 | 0.5 |
|  |  | (1, 1, 0, 1, 0) |  | 24.9 | 41.5 | 31.5 | 1.6 | 0.2 | 0.2 |
|  |  | (1, 1, 0, 1, 1) |  | 25.6 | 40.9 | 30.4 | 2.0 | 0.4 | 0.5 |
|  |  | (1, 1, 1, 0, 0) |  | 25.6 | 41.1 | 29.7 | 2.8 | 0.4 | 0.4 |
|  |  | (1, 1, 1, 0, 1) |  | 26.2 | 40.0 | 29.6 | 2.9 | 0.5 | 0.7 |
|  |  | (1, 1, 1, 1, 0) |  | 25.1 | 41.7 | 31.1 | 1.6 | 0.1 | 0.3 |
|  |  | (1, 1, 1, 1, 1) |  | 25.5 | 41.0 | 30.5 | 2.1 | 0.4 | 0.4 |
|  | 6 | (0, 0, 0, 0, 0) | 5 | 31.0 | 2.7 | 9.5 | 17.3 | 14.7 | 24.8 |
|  |  | (0, 0, 0, 0, 1) |  | 31.2 | 3.0 | 10.7 | 17.0 | 13.6 | 24.5 |
|  |  | (0, 0, 0, 1, 0) |  | 31.3 | 2.2 | 9.1 | 18.0 | 16.5 | 23.0 |
|  |  | (0, 0, 0, 1, 1) |  | 30.9 | 2.9 | 9.8 | 18.4 | 14.7 | 23.4 |
|  |  | (0, 0, 1, 0, 0) |  | 30.8 | 3.1 | 9.6 | 17.7 | 14.2 | 24.6 |
|  |  | (0, 0, 1, 0, 1) |  | 30.9 | 3.4 | 10.6 | 17.4 | 13.8 | 24.0 |
|  |  | (0, 0, 1, 1, 0) |  | 30.8 | 2.5 | 10.0 | 18.1 | 15.7 | 23.0 |
|  |  | (0, 0, 1, 1, 1) |  | 30.8 | 3.1 | 10.3 | 18.5 | 14.2 | 23.2 |
|  |  | (0, 1, 0, 0, 0) | 3 | 30.8 | 4.8 | 14.5 | 20.2 | 13.4 | 16.1 |
|  |  | (0, 1, 0, 0, 1) |  | 31.1 | 5.1 | 14.4 | 20.1 | 12.7 | 16.3 |
|  |  | (0, 1, 0, 1, 0) |  | 30.8 | 4.4 | 13.9 | 22.3 | 14.4 | 14.1 |
|  |  | (0, 1, 0, 1, 1) |  | 31.1 | 4.3 | 14.8 | 20.5 | 13.6 | 15.5 |
|  |  | (0, 1, 1, 0, 0) |  | 30.8 | 4.8 | 14.8 | 19.8 | 14.5 | 15.2 |
|  |  | (0, 1, 1, 0, 1) |  | 30.8 | 5.4 | 14.5 | 19.8 | 12.8 | 16.4 |
|  |  | (0, 1, 1, 1, 0) |  | 30.9 | 4.2 | 15.1 | 20.8 | 14.9 | 14.2 |
|  |  | (0, 1, 1, 1, 1) |  | 30.6 | 4.9 | 15.1 | 20.3 | 13.2 | 15.6 |
|  |  | (1, 0, 0, 0, 0) | 3 | 31.0 | 4.6 | 14.4 | 20.1 | 13.5 | 16.2 |
|  |  | (1, 0, 0, 0, 1) |  | 31.3 | 4.7 | 14.2 | 20.7 | 12.6 | 16.5 |
|  |  | (1, 0, 0, 1, 0) |  | 30.8 | 4.1 | 14.5 | 21.7 | 14.5 | 14.4 |
|  |  | (1, 0, 0, 1, 1) |  | 30.9 | 4.4 | 15.0 | 20.6 | 13.6 | 15.4 |
|  |  | (1, 0, 1, 0, 0) |  | 30.8 | 4.6 | 14.4 | 20.2 | 14.1 | 15.5 |
|  |  | (1, 0, 1, 0, 1) |  | 31.1 | 4.8 | 14.4 | 20.7 | 12.8 | 16.0 |
|  |  | (1, 0, 1, 1, 0) |  | 30.6 | 4.2 | 14.9 | 21.4 | 14.2 | 14.6 |
|  |  | (1, 0, 1, 1, 1) |  | 30.9 | 4.5 | 14.7 | 20.7 | 14.0 | 15.1 |
|  |  | (1, 1, 0, 0, 0) | 1 | 31.2 | 7.4 | 19.9 | 22.0 | 10.2 | 8.9 |
|  |  | (1, 1, 0, 0, 1) |  | 31.7 | 7.4 | 19.2 | 21.4 | 10.4 | 9.6 |
|  |  | (1, 1, 0, 1, 0) |  | 31.0 | 6.7 | 22.8 | 21.7 | 9.8 | 7.9 |
|  |  | (1, 1, 0, 1, 1) |  | 31.1 | 7.4 | 20.5 | 21.3 | 11.0 | 8.4 |
|  |  | (1, 1, 1, 0, 0) |  | 31.7 | 7.3 | 19.9 | 21.8 | 10.1 | 8.9 |
|  |  | (1, 1, 1, 0, 1) |  | 31.5 | 7.7 | 19.4 | 20.8 | 10.9 | 9.1 |
|  |  | (1, 1, 1, 1, 0) |  | 30.8 | 7.1 | 22.7 | 21.2 | 10.3 | 7.7 |
|  |  | (1, 1, 1, 1, 1) |  | 31.3 | 6.8 | 21.6 | 20.3 | 11.0 | 8.6 |
|  | 7 | (0, 0, 0, 0, 0) | 4 | 29.6 | 2.2 | 17.6 | 36.5 | 12.9 | 1.3 |
|  |  | (0, 0, 0, 0, 1) |  | 29.8 | 2.7 | 16.9 | 35.6 | 13.1 | 1.9 |
|  |  | (0, 0, 0, 1, 0) |  | 28.7 | 1.9 | 18.5 | 38.6 | 11.6 | 0.7 |
|  |  | (0, 0, 0, 1, 1) |  | 29.0 | 2.4 | 17.3 | 37.3 | 12.6 | 1.3 |
|  |  | (0, 0, 1, 0, 0) |  | 29.5 | 2.1 | 17.6 | 36.4 | 12.8 | 1.6 |
|  |  | (0, 0, 1, 0, 1) |  | 29.8 | 2.1 | 18.2 | 34.6 | 12.8 | 2.5 |
|  |  | (0, 0, 1, 1, 0) |  | 28.9 | 1.8 | 18.1 | 38.1 | 12.3 | 0.9 |
|  |  | (0, 0, 1, 1, 1) |  | 29.1 | 2.0 | 18.0 | 36.7 | 12.5 | 1.7 |
|  |  | (0, 1, 0, 0, 0) | 5 | 42.2 | 2.3 | 7.8 | 24.6 | 17.9 | 5.3 |
|  |  | (0, 1, 0, 0, 1) |  | 42.5 | 2.3 | 8.0 | 23.7 | 17.0 | 6.5 |
|  |  | (0, 1, 0, 1, 0) |  | 41.5 | 2.4 | 6.4 | 27.6 | 18.6 | 3.6 |
|  |  | (0, 1, 0, 1, 1) |  | 41.8 | 2.1 | 6.9 | 26.4 | 18.1 | 4.9 |
|  |  | (0, 1, 1, 0, 0) |  | 41.4 | 2.2 | 7.5 | 26.0 | 17.8 | 5.3 |
|  |  | (0, 1, 1, 0, 1) |  | 42.4 | 2.2 | 7.3 | 25.4 | 16.2 | 6.6 |
|  |  | (0, 1, 1, 1, 0) |  | 40.5 | 2.2 | 6.7 | 28.5 | 17.9 | 4.4 |
|  |  | (0, 1, 1, 1, 1) |  | 41.1 | 1.9 | 7.6 | 27.2 | 16.6 | 5.7 |
|  |  | (1, 0, 0, 0, 0) | 5 | 43.4 | 2.0 | 7.4 | 24.8 | 17.5 | 5.1 |
|  |  | (1, 0, 0, 0, 1) |  | 43.8 | 2.1 | 7.8 | 24.2 | 16.9 | 5.4 |
|  |  | (1, 0, 0, 1, 0) |  | 42.1 | 1.9 | 7.2 | 27.2 | 17.7 | 4.0 |
|  |  | (1, 0, 0, 1, 1) |  | 43.2 | 1.8 | 7.5 | 25.3 | 18.2 | 4.1 |
|  |  | (1, 0, 1, 0, 0) |  | 43.2 | 1.6 | 7.9 | 26.1 | 16.8 | 4.6 |
|  |  | (1, 0, 1, 0, 1) |  | 43.9 | 2.0 | 7.4 | 25.4 | 15.9 | 5.5 |
|  |  | (1, 0, 1, 1, 0) |  | 42.5 | 1.9 | 6.7 | 28.2 | 17.1 | 3.8 |
|  |  | (1, 0, 1, 1, 1) |  | 42.7 | 1.9 | 7.3 | 26.9 | 16.5 | 4.8 |
|  |  | (1, 1, 0, 0, 0) | 1 | 61.9 | 2.3 | 2.7 | 10.7 | 16.3 | 6.2 |
|  |  | (1, 1, 0, 0, 1) |  | 62.0 | 2.0 | 2.8 | 11.3 | 14.8 | 7.3 |
|  |  | (1, 1, 0, 1, 0) |  | 62.6 | 1.8 | 2.5 | 10.4 | 17.8 | 5.0 |
|  |  | (1, 1, 0, 1, 1) |  | 61.4 | 2.0 | 2.7 | 10.9 | 16.9 | 6.3 |
|  |  | (1, 1, 1, 0, 0) |  | 61.9 | 2.1 | 2.7 | 11.1 | 16.4 | 5.9 |
|  |  | (1, 1, 1, 0, 1) |  | 61.9 | 1.7 | 2.7 | 12.0 | 15.0 | 6.8 |
|  |  | (1, 1, 1, 1, 0) |  | 61.8 | 2.2 | 2.5 | 11.0 | 17.9 | 4.8 |
|  |  | (1, 1, 1, 1, 1) |  | 61.5 | 1.9 | 2.5 | 12.4 | 15.7 | 6.1 |
